# Supplementary material for: Mapping the cause-specific premature mortality reveals large between-districts disparity in Belgium, 2003–2009
Source: Springer Nature journal article supplement (doi:10.1186/s13690-015-0060-5), 2015-03-17

# Regions and Provinces of Belgium

## REGIONS

-  Flemish Region
-  Brussels
-  Walloon Region

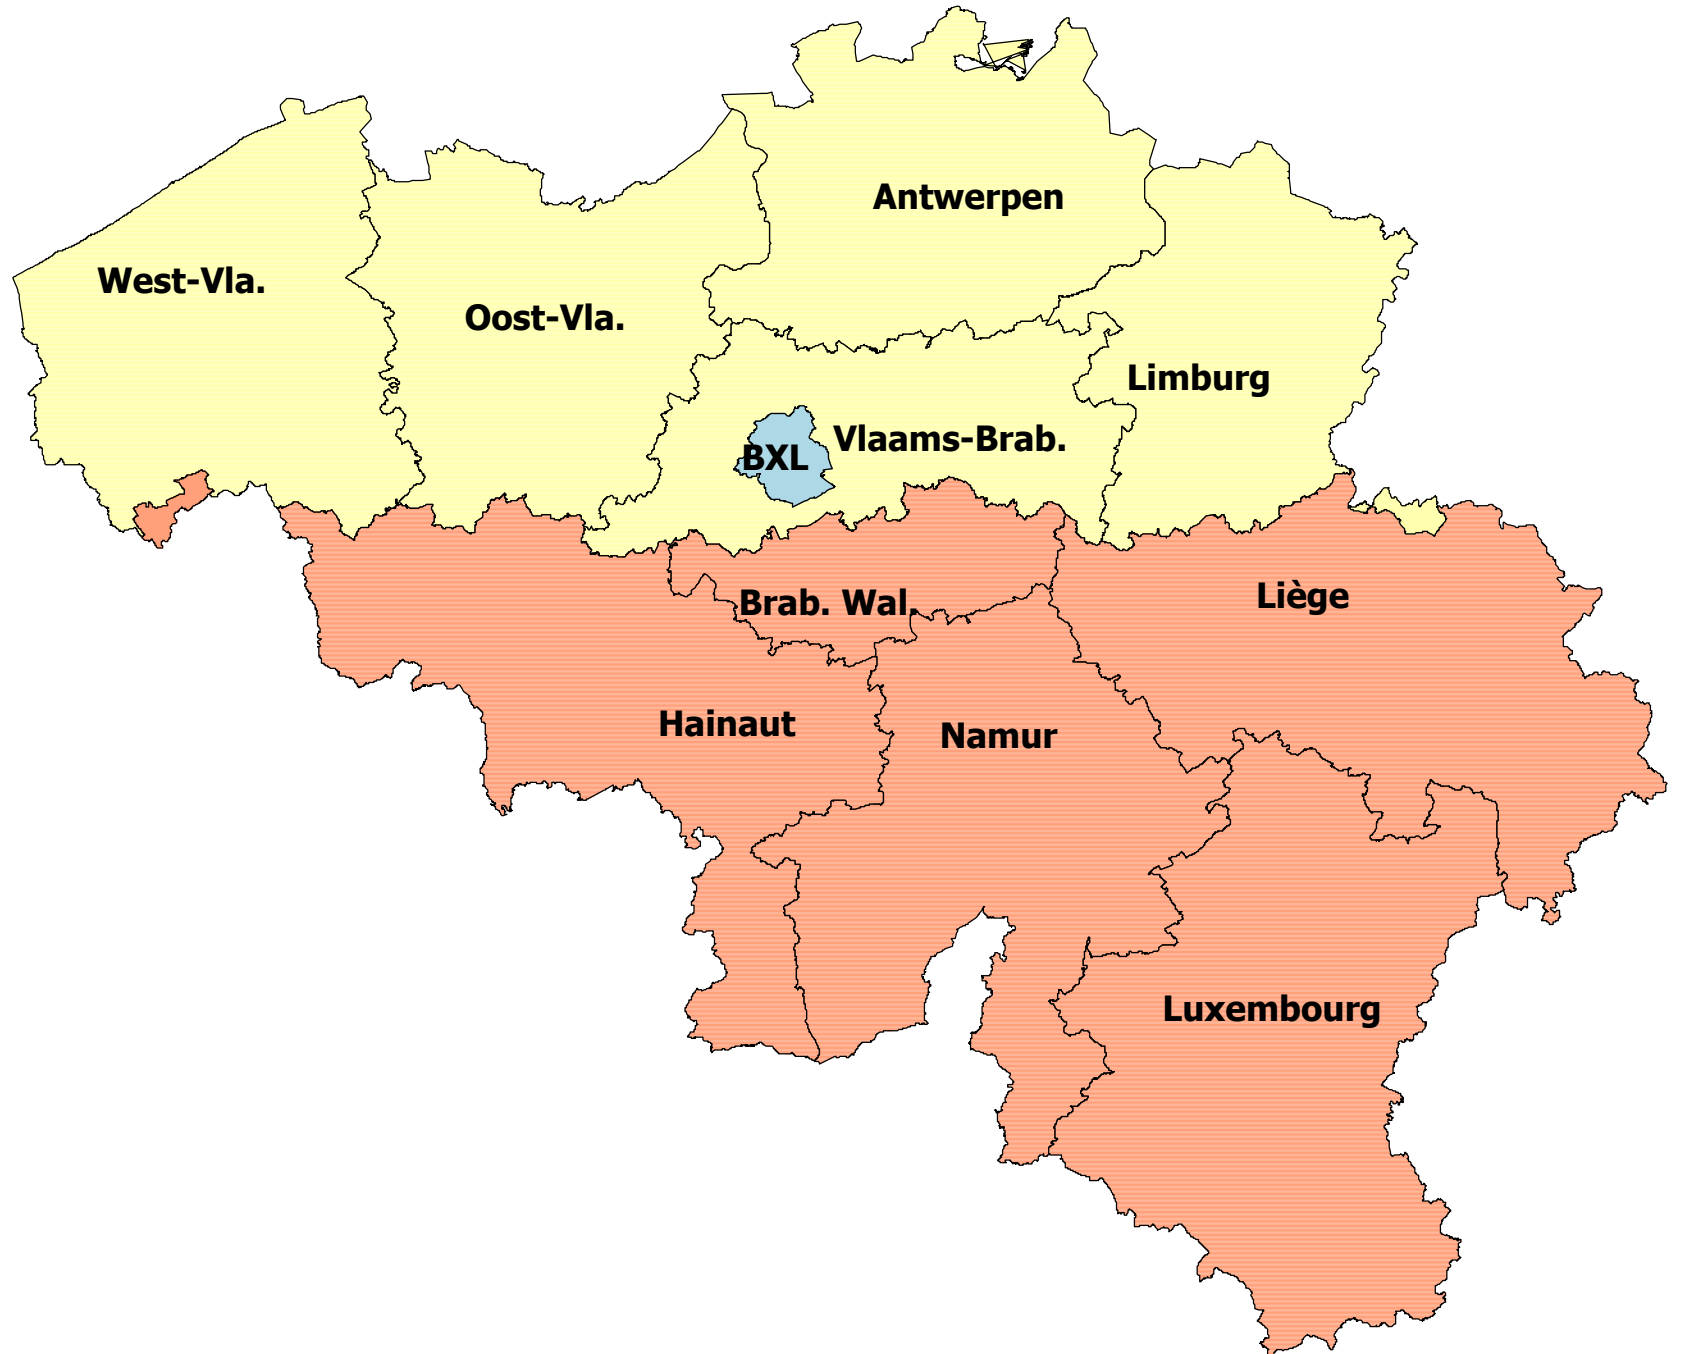

Supplement: MOESM1 [file 9787796]
