# Supplementary material for: Mapping the cause-specific premature mortality reveals large between-districts disparity in Belgium, 2003–2009
Source: Springer Nature journal article supplement (doi:10.1186/s13690-015-0060-5), 2015-03-17

# Provinces and Districts of Belgium

## PROVINCES

- Antwerpen
- West-Vlaanderen
- Oost-Vlaanderen
- Hainaut
- Liège
- Limburg
- Luxembourg
- Namur
- Vlaams-Brabant
- Brabant Wallon
- Brussels

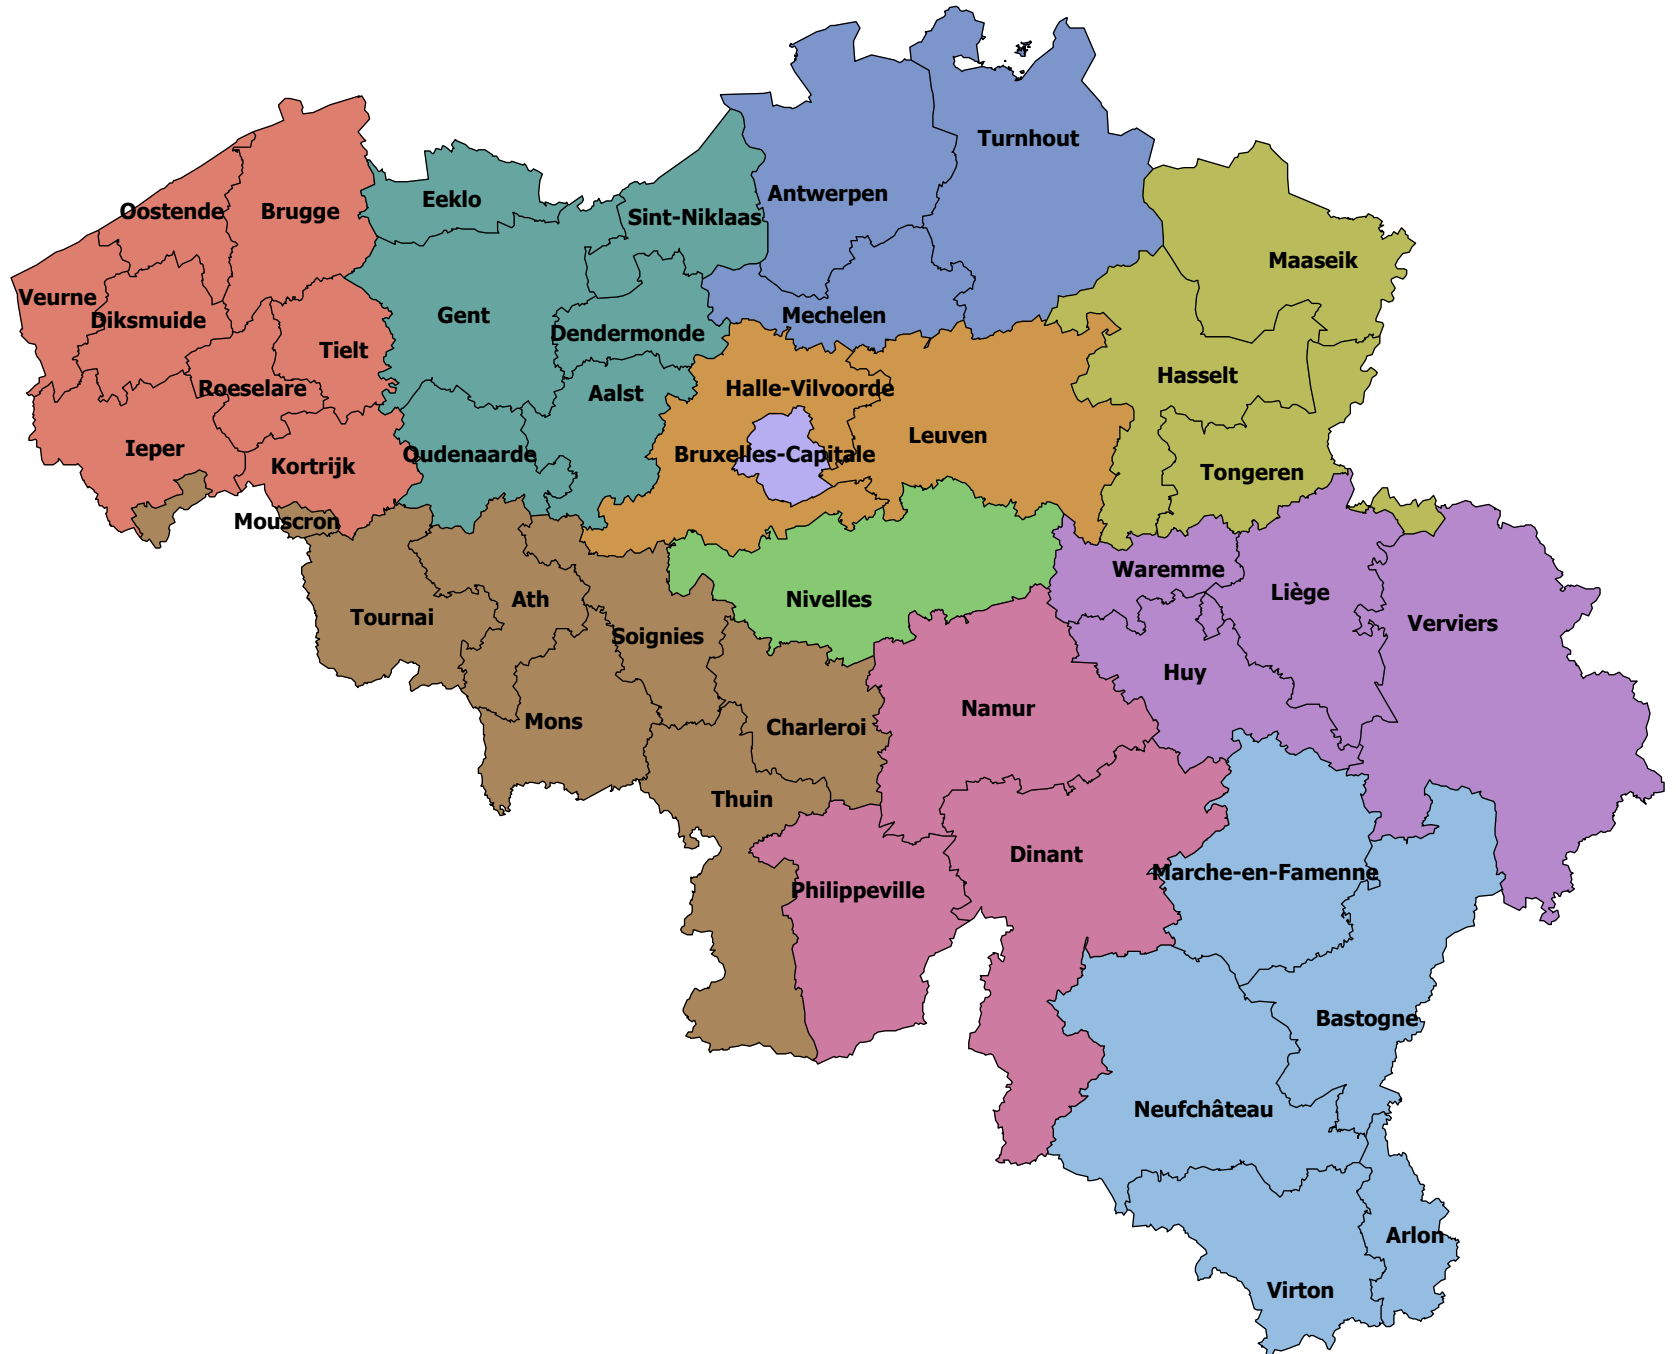

Supplement: MOESM2 [file 9787796]
