# Supplementary material for: Mapping the cause-specific premature mortality reveals large between-districts disparity in Belgium, 2003–2009
Source: Springer Nature journal article supplement (doi:10.1186/s13690-015-0060-5), 2015-03-17
Supplement: MOESM10 [file 9787796]

# Lung Ca Mortality in Men aged 40-59 yr, Belgium 2003-2009

## Age-Adjusted Mortality Rates (Std: Belgian population 2000)

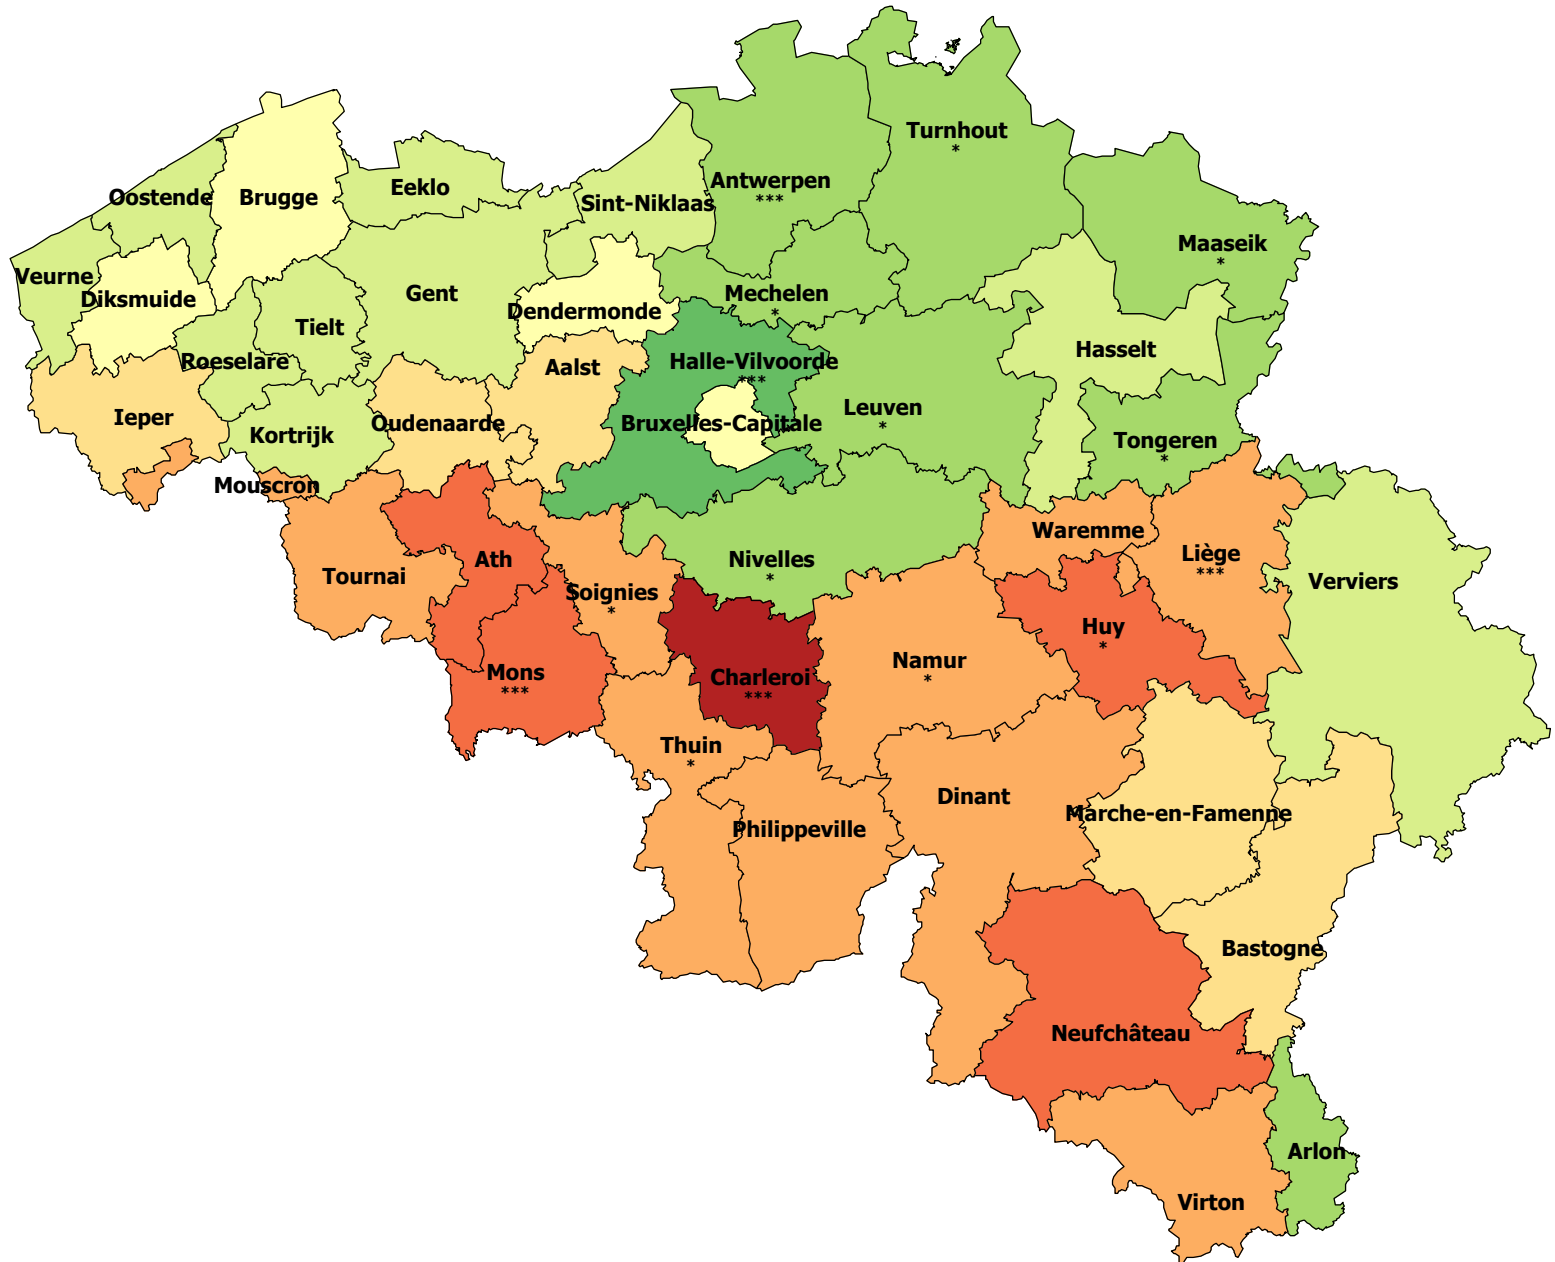

Std Rates p 100.000

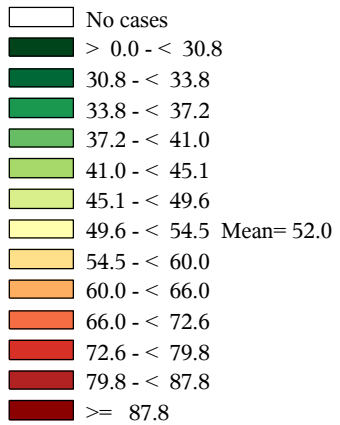

Range: 40 - 83 per 100.000
