# Supplementary material for: Mapping the cause-specific premature mortality reveals large between-districts disparity in Belgium, 2003–2009
Source: Springer Nature journal article supplement (doi:10.1186/s13690-015-0060-5), 2015-03-17
Supplement: MOESM18 [file 9787796]

# Breast Ca Mortality in Women aged 60-74 yr, Belgium 2003-2009

## Age-Adjusted Mortality Rates (Std: Belgian population 2000)

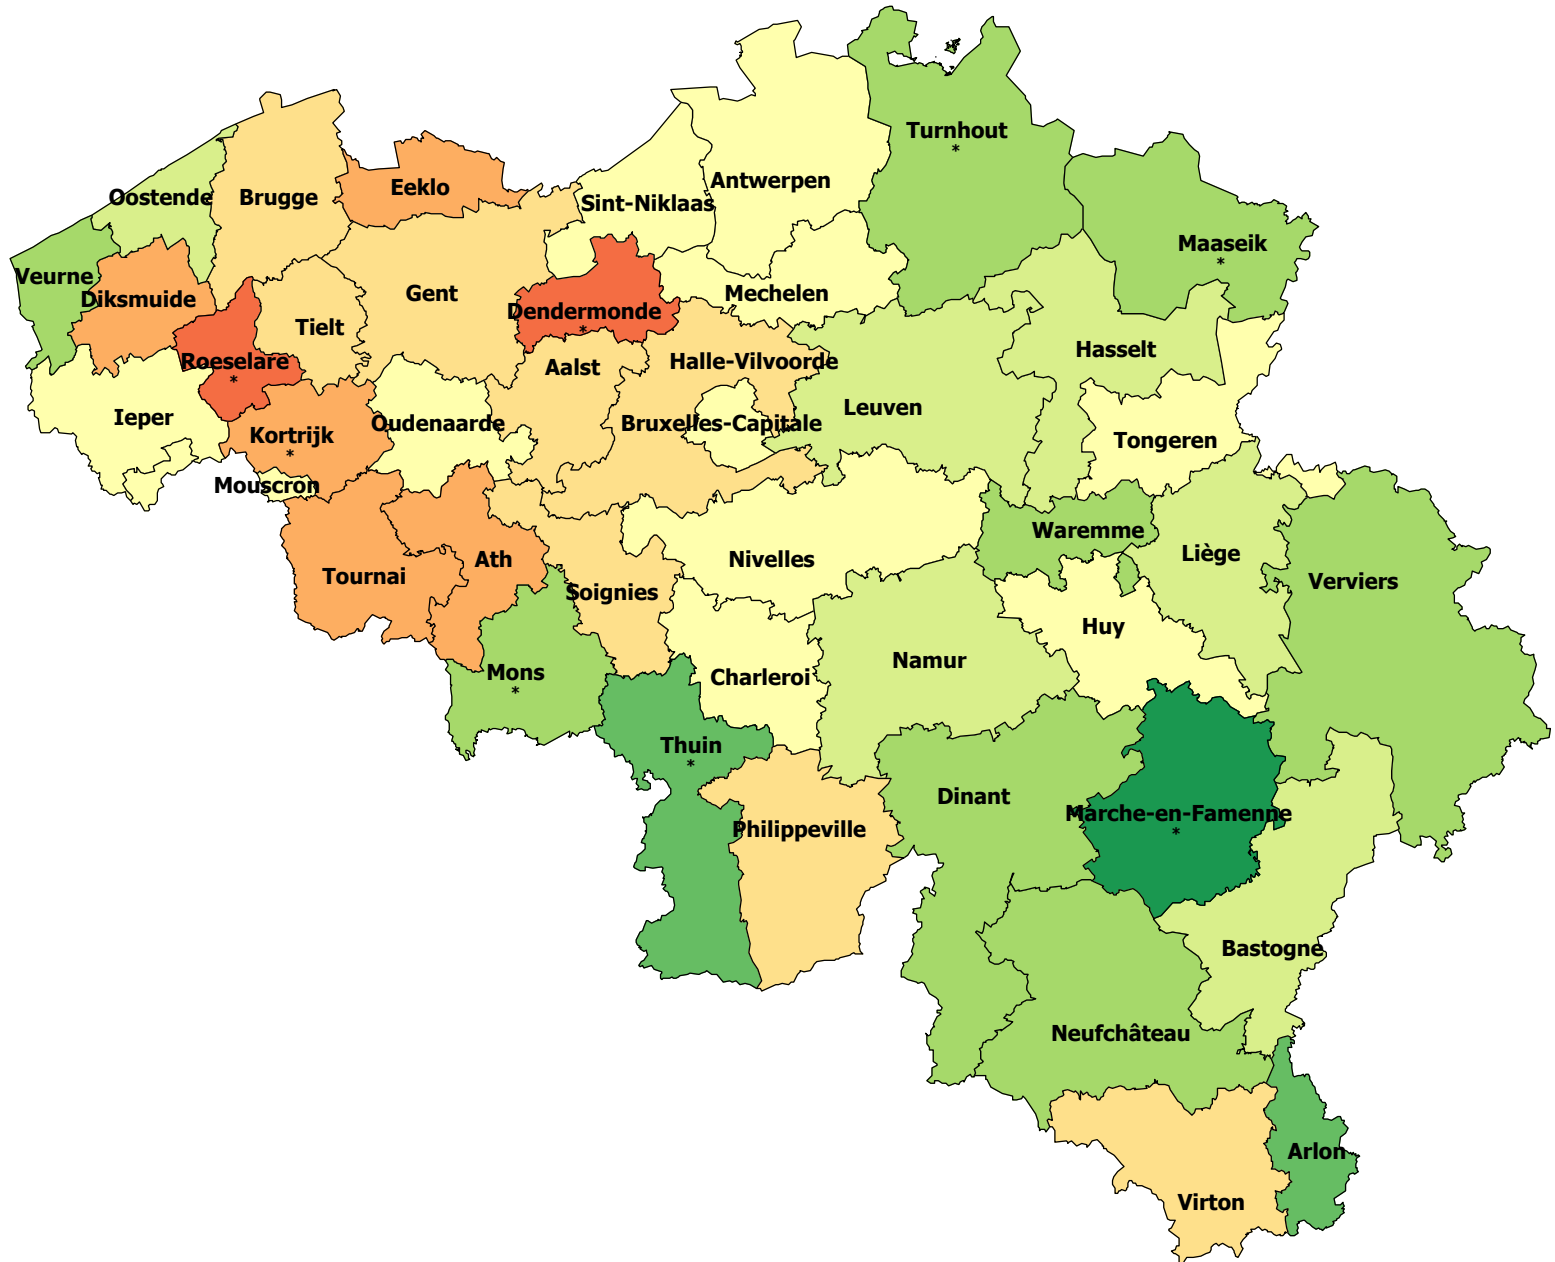

Std Rates p 100.000

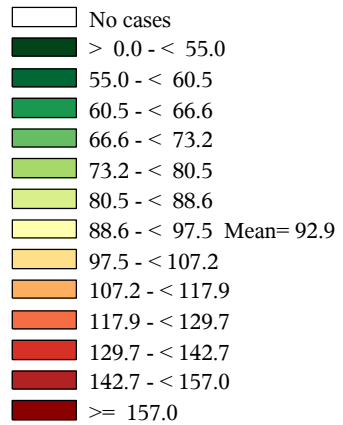

Range: 62 - 128 per 100.000

| Directory            |                                                                                  |
|----------------------|----------------------------------------------------------------------------------|
| <b>Libref</b>        | WORK                                                                             |
| <b>Engine</b>        | V9                                                                               |
| <b>Physical Name</b> | C:\Users\FRenard\AppData\Local\Temp\SAS Temporary Files\_TD6028_LT100219SLCDFRE_ |
| <b>Filename</b>      | C:\Users\FRenard\AppData\Local\Temp\SAS Temporary Files\_TD6028_LT100219SLCDFRE_ |

| #  | Name                | Member Type | File Size | Last Modified    |
|----|---------------------|-------------|-----------|------------------|
| 1  | CLASS               | DATA        | 17408     | 06Feb15:09:33:43 |
| 2  | FORMATS             | CATALOG     | 29696     | 06Feb15:09:33:44 |
| 3  | GSEG                | CATALOG     | 697344    | 06Feb15:09:33:45 |
| 4  | LABEL_ARR           | DATA        | 13312     | 06Feb15:09:33:44 |
| 5  | LABEL_ARR_0         | DATA        | 13312     | 06Feb15:09:33:44 |
| 6  | LABEL_ARR_1         | DATA        | 13312     | 06Feb15:09:33:44 |
| 7  | MAPARR              | DATA        | 414720    | 06Feb15:09:33:43 |
| 8  | MAPPROV             | DATA        | 9364480   | 06Feb15:09:33:43 |
| 9  | PDF                 | CATALOG     | 697344    | 06Feb15:09:33:45 |
| 10 | RATESPYLL_ARR       | DATA        | 33792     | 06Feb15:09:33:43 |
| 11 | RATESPYLL_AVERAGE_2 | DATA        | 9216      | 06Feb15:09:33:43 |
| 12 | RATESPYLL_GEO       | DATA        | 33792     | 06Feb15:09:33:43 |
| 13 | RBYSEX_GEO          | DATA        | 10421248  | 06Feb15:09:33:43 |
| 14 | RES1                | DATA        | 9216      | 06Feb15:09:33:44 |
| 15 | SASGOPT             | CATALOG     | 5120      | 06Feb15:08:10:23 |
| 16 | SASMACR             | CATALOG     | 5120      | 06Feb15:08:10:23 |
| 17 | SELECT_2_PERC       | DATA        | 9216      | 06Feb15:09:33:44 |
| 18 | TABLES              | DATA        | 33792     | 06Feb15:09:33:27 |
